# Supplementary material
Source: HighWire-hosted journal article supplement (https://jnm.snmjournals.org/highwire/filestream/94672/field_highwire_adjunct_files/0/149229_Supplemental_Data.pdf)
Supplement: 149229_Supplemental_Data.pdf [file 149229_Supplemental_Data.pdf]

Supplemental Table 1. AD Subject–Wise Mean Neocortical Distance[v] and Voxel Counts for <sup>18</sup>F-THK5117–and <sup>11</sup>C-PiB–Positive Voxels (Cutoff, 1.5 SDs)

|           | Total cortex (mm)   |                     | Frontal cortex (mm) |                     | Parietal cortex (mm) |                     | Temporal cortex (mm) |                     | Occipital cortex (mm) |                     | Number of positive-voxels (10 <sup>4</sup> ) |                     |
|-----------|---------------------|---------------------|---------------------|---------------------|----------------------|---------------------|----------------------|---------------------|-----------------------|---------------------|----------------------------------------------|---------------------|
|           | <sup>18</sup> F-THK | <sup>11</sup> C-PiB | <sup>18</sup> F-THK | <sup>11</sup> C-PiB | <sup>18</sup> F-THK  | <sup>11</sup> C-PiB | <sup>18</sup> F-THK  | <sup>11</sup> C-PiB | <sup>18</sup> F-THK   | <sup>11</sup> C-PiB | <sup>18</sup> F-THK                          | <sup>11</sup> C-PiB |
| Subject 1 | 1.59                | 1.88                | 1.42                | 2.02                | 1.32                 | 1.58                | 1.99                 | 2.08                | 1.41                  | 1.63                | 5.2                                          | 21.3                |
| Subject 2 | 1.36                | 1.65                | 1.35                | 1.77                | 1.25                 | 1.45                | 1.47                 | 1.61                | 1.33                  | 1.62                | 4.4                                          | 16.1                |
| Subject 3 | 1.42                | 1.66                | 1.38                | 1.66                | 1.37                 | 1.51                | 1.49                 | 1.77                | 1.4                   | 1.61                | 2.6                                          | 23.1                |
| Subject 4 | 1.63                | 1.67                | 1.51                | 1.64                | 1.36                 | 1.47                | 1.87                 | 2                   | 1.66                  | 1.76                | 5.2                                          | 26.0                |
| Subject 5 | 1.48                | 1.78                | 1.42                | 1.82                | 1.28                 | 1.49                | 1.66                 | 1.99                | 1.41                  | 1.7                 | 4.6                                          | 24.8                |
| Mean (AD) | 1.50                | 1.73                | 1.42                | 1.78                | 1.32                 | 1.50                | 1.70                 | 1.89                | 1.44                  | 1.66                | 4.4                                          | 22.3                |

Supplemental Table 2. Healthy Subject–Wise Mean Neocortical Distance[v] and Voxel Counts for <sup>18</sup>F-THK5117–and <sup>11</sup>C-PiB–Positive Voxels (Cutoff, 1.5 SDs)

|                | Total cortex (mm)   |                     | Frontal cortex (mm) |                     | Parietal cortex (mm) |                     | Temporal cortex (mm) |                     | Occipital cortex (mm) |                     | Number of positive voxels (10 <sup>5</sup> ) |                     |
|----------------|---------------------|---------------------|---------------------|---------------------|----------------------|---------------------|----------------------|---------------------|-----------------------|---------------------|----------------------------------------------|---------------------|
|                | <sup>18</sup> F-THK | <sup>11</sup> C-PiB | <sup>18</sup> F-THK | <sup>11</sup> C-PiB | <sup>18</sup> F-THK  | <sup>11</sup> C-PiB | <sup>18</sup> F-THK  | <sup>11</sup> C-PiB | <sup>18</sup> F-THK   | <sup>11</sup> C-PiB | <sup>18</sup> F-THK                          | <sup>11</sup> C-PiB |
| Subject 1      | 1.4                 | 1.36                | 1.41                | 1.38                | 1.24                 | 1.33                | 1.38                 | 1.35                | 1.27                  | 1.32                | 2.7                                          | 3.9                 |
| Subject 2      | 1.43                | 1.44                | 1.37                | 1.41                | 1.18                 | 1.35                | 1.59                 | 1.49                | 1.28                  | 1.57                | 1.9                                          | 3.4                 |
| Subject 3      | 1.5                 | 1.41                | 1.21                | 1.37                | 1.19                 | 1.37                | 1.8                  | 1.47                | 1.16                  | 1.49                | 1.6                                          | 2.1                 |
| Subject 4      | 1.21                | 1.78                | 1.16                | 1.3                 | 1.2                  | 1.72                | 1.28                 | 1.77                | 1.24                  | 1.97                | 1.2                                          | 1                   |
| Subject 5      | 1.48                | 1.49                | 1.49                | 1.48                | 1.02                 | 1.41                | 1.14                 | 1.53                | 1.06                  | 1.55                | 0.2                                          | 3.7                 |
| Mean (Control) | 1.40                | 1.50                | 1.33                | 1.39                | 1.17                 | 1.44                | 1.44                 | 1.52                | 1.20                  | 1.58                | 1.5                                          | 2.8                 |

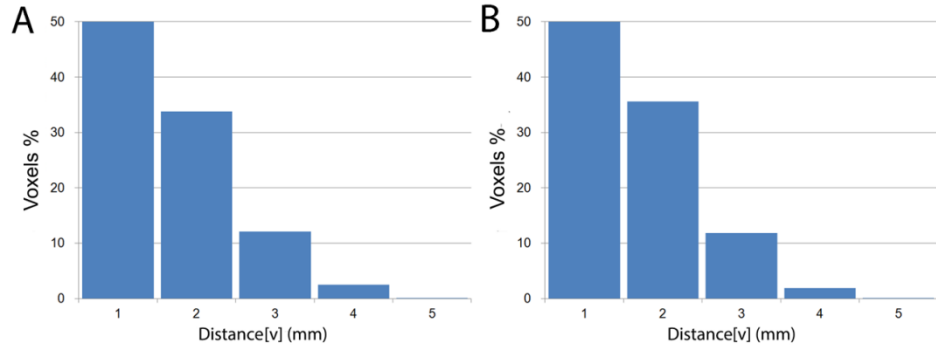

Supplemental Figure 1. Control distance[v] histogram for neocortical THK5117- and PiB-positive voxels (1.5 SDs). (A) Distance[v] histogram of THK5117-positive voxels in the total neocortex. (B) Distance[v] histogram of PiB-positive voxels in the total neocortex.

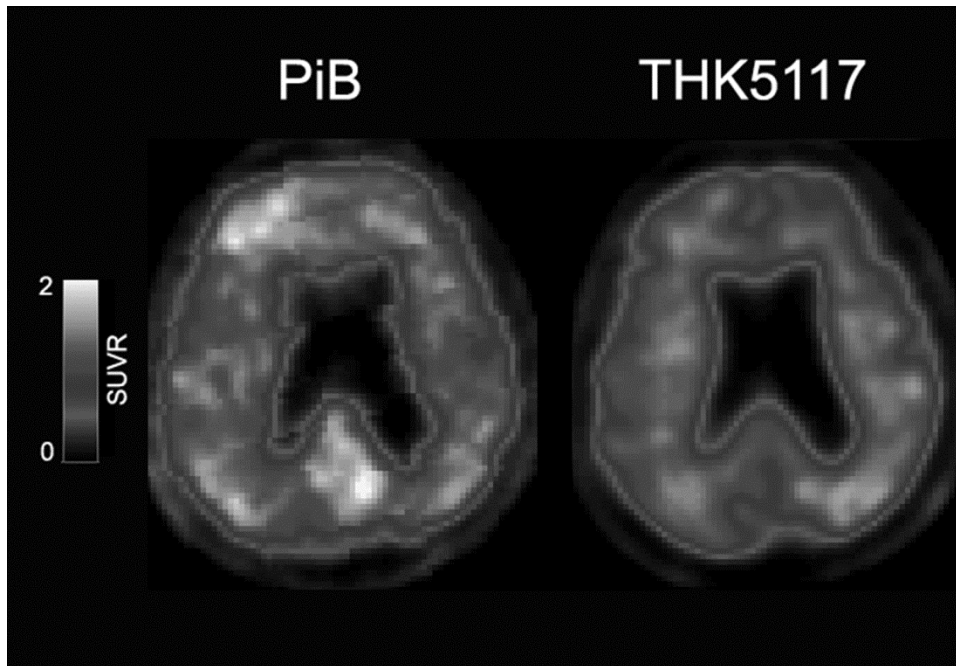

Supplemental Figure 2.  $^{18}\text{F}$ -THK5117 and  $^{11}\text{C}$ -PiB PET in an AD subject.
